# Supplementary material for: Copy number variation leads to considerable diversity for B but not A haplotypes of the human KIR genes encoding NK cell receptors
Source: HighWire-hosted journal article supplement (doi:10.1101/gr.137976.112), 2012-09-04
Supplement: Jiang_Supplement.docx [file Jiang_Supplement.docx]

**Supplemental Material**

**Conservative estimations of KIR haplotypes in the UK/US populations of European-descent**

**Method 1:** Taking into consideration some major gene loci groups/LD as shown below.

| **Group 1** | **Group 2** | **Group 3** | **Group 4** | **Group 5** |
| --- | --- | --- | --- | --- |
| 2DS2 − 2DL2 | 2DL1-2DP1 | 2DL4 − 3DL1 | 2DL5 − 2DS3S5 | 2DS1 |
| 2DL3 | Missing | 2DL4 − 3DS1 | 2DL5 − 2DL5 − 2DS3S5 −2DS3S5 | 2DS4f |
|  |  | 2DL4 − 2DL4 − 3DL1 −3DS1 | Missing | 2DS4v |
|  |  | 2DL4 − 2DL4 − 3DS1 −3DS1 |  |  |
| No. of variants:  : |  | Missing |  |  |

2

2

3

3

5

Total number of haplotypes = 2x2x5x3x3 = 180

N.B. some groups themselves show LD thereby further reducing the overall number of haplotypes.

**Method 2:** The basic approach is illustrated below. For example, Population 1 shares 28 haplotypes with Population 2 and both populations have 22 haplotypes that are not shared (values approximate our data).

22

haplotypes

22

haplotypes

28

haplotypes

Population 1

Population 2

Total population

Minimum number of haplotypes in the total population = π 5.42 = 92

| Gene | Oligos | Seqence (5'-3') | Length | Alleles might miss | Reference |
| --- | --- | --- | --- | --- | --- |
| 3DL3 | Forward Primer | GGTGAAATCRGGAGAGACG | 19 | 3DL3*054, 3DL3*00905 |  |
| Reverse Primer | AGTTGACCTGGGAACCCG | 18 |  |  |
| Probe | TCATCCTGCAATGTTGGTCAGATGTCA | 27 |  |  |
| 2DS2 | Forward Primer | GTCCCCTGGTGAAATCAGA | 19 |  |  |
| Reverse Primer | TGAGGTGCAAAGTGTCCTTAT | 21 |  |  |
| Probe | TCATCCTGCAATGTTGGTCAGATGTCA | 27 |  |  |
| 2DL2 | Forward Primer | GAGGTGGAGGCCCATGAAT | 19 | 2DL2*009; 782G to A mismatch a | ([Ashouri *et al.* 2009](#_ENREF_1)) |
| Reverse Primer | TCGAGTTTGACCACTCGTAT | 20 |  | ([Martin and Carrington 2008](#_ENREF_3)) |
| Probe | AACATTCCAGGCCGACTTTCCTCTG | 25 |  |  |
| 2DL3 | Forward Primer | AGACCCTCAGGAGGTGA | 17 |  | ([Vilches et al. 2007](#_ENREF_4)) |
| Reverse Primer b | CAGGAGACAACTTTGGATCA | 20 | 2DL3*010, 2DL3*017 | ([Vilches *et al.* 2007](#_ENREF_4)) |
| Probe | CCCTTCTCAGAGGCCCAAGACACC | 24 | 2DL3*01201 |  |
| 2DP1 | Forward Primer | CCTCAGGAGGTGACATACGT | 20 |  |  |
| Reverse Primer | TTGGAAGTTCCGTGTACACT | 20 |  |  |
| Probe | CCCTTCTCAGAGGCCCAAGACACC | 24 |  |  |
| 2DL1 | Forward Primer | TTCTCCATCAGTCGCATGAC | 20 | 2DL1*020 |  |
| Reverse Primer | GTCACTGGGAGCTGACAC | 18 | 2DL1*023 |  |
| Probe | AACAGAACCGTAGCATCTGTAGGTCCCT | 28 |  |  |
| 3DP1 | Forward Primer | GTCCCCTGGTGAAATCAGA | 19 |  |  |
| Reverse Primer | GTGAGGCGCAAAGTGTCA | 18 |  |  |
| Probe | TCATCCTGCAATGTTGGTCAGATGTCA | 27 |  |  |
| 2DL4 | Forward Primer | GCAGTGCCCAGCATCAAT | 18 |  |  |
| Reverse Primer | CCGAAGCATCTGTAGGTCT | 19 | 2DL4*018, 2DL4*019 |  |
| Probe | AACATTCCAGGCCGACTTCCCTCTG | 25 | 2DL4*009001, *009002, *021 |  |
| 3DL1a | Forward Primer | CATCGGTCCCATGATGCT | 18 | 3DL1*006, 3DL1*054 | ([Vilches *et al.* 2007](#_ENREF_4)) |
| Reverse Primer | GGGAGCTGACAACTGATAGG | 20 | 3DL1*00502 |  |
| Probe | AACAGAACCGTAGCATCTGTAGGTCCCT | 28 | 3DL1*01503, 3DL1*056 |  |
| 3DL1b | Forward Primer | CACAGTTGGATCACTGCGT | 19 | 3DL1*061, 3DL1*068 |  |
| Reverse Primer c | CCGTGTACAAGATGGTATCTGTA | 23 |  | ([Vilches *et al.* 2007](#_ENREF_4)) |
| Probe | CCCTTCTCAGAGGCCCAAGACACC | 24 | Designed to miss 3DL1*060 |  |
| 3DS1 | Forward Primer | CATCGGTTCCATGATGCG | 18 | 3DS1*047; may detect 3DL1*054 | ([Vilches et al. 2007](#_ENREF_4)) |
| Reverse Primer | GGGAGCTGACAACTGATAGG | 20 |  |  |
| Probe | AACAGAACCGTAGCATCTGTAGGTCCCT | 28 |  |  |
| 2DL5 | Forward Primer | CACTGCGTTTTCACACAGAC | 20 | 2DL5B*011 |  |
| Reverse Primer | GGCAGGAGACAATGATCTT | 19 |  |  |
| Probe | CCCTTCTCAGAGGCCCAAGACACC | 24 |  |  |
| 2DS3 | Forward Primer | CTCCATCGGTCGCATGAG | 18 |  |  |
| Reverse Primer | GGGTCACTGGGAGCTGAA | 18 |  |  |
| Probe | AACAGAACCGTAGCATCTGTAGGTCCCT | 28 |  |  |
| 2DS5 | Forward Primer | AGAGAGGGGACGTTTAACC | 19 |  | ([Vilches *et al.* 2007](#_ENREF_4)) |
| Reverse Primer | TCCAGAGGGTCACTGGGC | 18 | 2DS5*003 |  |
| Probe | AACAGAACCGTAGCATCTGTAGGTCCCT | 28 |  |  |
| 2DS1 | Forward Primer | TCTCCATCAGTCGCATGAA | 19 | 2DS1*001 | ([Vilches *et al.* 2007](#_ENREF_4)) |
| Reverse Primer | GGTCACTGGGAGCTGAC | 17 |  | ([Vilches *et al.* 2007](#_ENREF_4)) |
| Probe | AACAGAACCGTAGCATCTGTAGGTCCCT | 28 |  |  |
| 2DS4 | Forward Primer | TCCCTGCAGTGCGCAGC | 17 |  |  |
| Reverse Primer | TTGACCACTCGTAGGGAGC | 19 | 2DS4*013 | ([Ashouri *et al.* 2009](#_ENREF_1)) |
| Probe | AACATTCCAGGCCGACTTTCCTCTG | 25 | 2DS4*009, *00103 |  |
| 2DS4f | Forward Primer | CCGGAGCTCCTATGACATG | 19 |  |  |
| Reverse Primer | TGACGGAAACAAGCAGTGGA | 20 |  |  |
| Probe | AACATTCCAGGCCGACTTTCCTCTG | 25 |  |  |
| 2DS4v | Forward Primer | CCTTGTCCTGCAGCTCCAT | 19 |  |  |
| Reverse Primer | TGACGGAAACAAGCAGTGGA | 20 |  |  |
| Probe | AACATTCCAGGCCGACTTTCCTCTG | 25 | 2DS4*009 |  |
| 3DL2a | Forward Primer | GCCCCTGCTGAAATCAGG | 18 | 3DL2*008, *021, *027, *038 |  |
| Reverse Primer | CTGCAAGGACAGGCATCAA | 19 | 3DL2*048 |  |
| Probe | TCATCCTGCAATGTTGGTCAGATGTCA | 27 | 3DL2*00502, *01102, *01302, *030, *051, *056 |  |
| 3DL2b | Forward Primer | CACAGTTGGATCACTGCGT | 19 |  |  |
| Reverse Primer | GACCTGACTGTGGTGCTCG | 19 |  |  |
| Probe | CCCTTCTCAGAGGCCCAAGACACC | 24 |  |  |
| STAT6 | Forward Primer | CCAGATGCCTACCATGGTGC | 20 |  | ([Degenhardt *et al.* 2009](#_ENREF_2)) |
| Reverse Primer | CCATCTGCACAGACCACTCC | 20 |  | ([Degenhardt *et al.* 2009](#_ENREF_2)) |
| Probe | CTGATTCCTCCATGAGCATGCAGCTT | 26 |  | ([Degenhardt *et al.* 2009](#_ENREF_2)) |
|  | | | | | |
| a Primer position numbering is based on coding sequence from IPD - KIR Database (Release 2.4.0, 15 April 2011. http://www.ebi.ac.uk/ipd/kir/). | | | | | |
| b Since Release 2.2.0, 2DL3 sequences were truncated from position 1319 to position 1342, as sequence is not part of CDS. However, the ability of oligo binding to the genomic sequence is not affected. | | | | | |
| c Primer was designed to miss the 3DL1/3DL2 fusion allele: 3DL1*059, 3DL1*060, 3DL1*061, 3DL1*064 and 3DL1*065. | | | | | |
|  | | | | | |

Ashouri, E., A. Ghaderi, et al. (2009). "A novel duplex SSP-PCR typing method for KIR gene profiling." Tissue Antigens 74(1): 62-67.

Degenhardt, J. D., P. de Candia, et al. (2009). "Copy number variation of CCL3-like genes affects rate of progression to simian-AIDS in Rhesus Macaques (Macaca mulatta)." PLoS Genet 5(1): e1000346.

Martin, M. P. and M. Carrington (2008). "KIR locus polymorphisms: genotyping and disease association analysis." Methods Mol Biol 415: 49-64.

Vilches, C., J. Castano, et al. (2007). "Facilitation of KIR genotyping by a PCR-SSP method that amplifies short DNA fragments." Tissue Antigens 70(5): 415-422.
